# Supplementary material for: Cu/graphene interdigitated electrodes with various copper thicknesses for UV-illumination-enhanced gas sensors at room temperature
Source: Royal Society of Chemistry journal article supplement (doi:10.1039/d0cp04405a), 2020-01-01
Supplement: d0cp04405a1.pdf [file d0cp04405a1.pdf]

## Supplementary Information

### Cu/Graphene Interdigitated Electrodes with Various Copper Thicknesses for UV-illumination-enhanced Gas Sensors at Room Temperature

Min Zhao,<sup>ab</sup> Attia Falak,<sup>bc</sup> Yi Tian,<sup>bc</sup> Lanqin Yan,<sup>b</sup> Rujun Liu,<sup>a</sup> Weijun Chen,<sup>a</sup> Hanfu Wang,<sup>b</sup> Tao Wu,<sup>\*a</sup> Peipei Chen,<sup>\*bc</sup> Weiguo Chu<sup>\*bc</sup>

<sup>a</sup> School of Information Engineering, Lingnan Normal University, Zhanjiang, Guangdong, 524048, China.

<sup>b</sup> CAS Key Laboratory for Nanophotonic Materials and Devices, Nanofabrication Laboratory, CAS Center for Excellence in Nanoscience, National Center for Nanoscience and Technology, Beijing 100190, P. R. China.

<sup>c</sup> Center of Materials Science and Optoelectronics Engineering, University of Chinese Academy of Sciences, Beijing, 100039, China

\*Email: wgchu@nanoctr.cn, chenpp@nanoctr.cn, wutao@whu.edu.cn

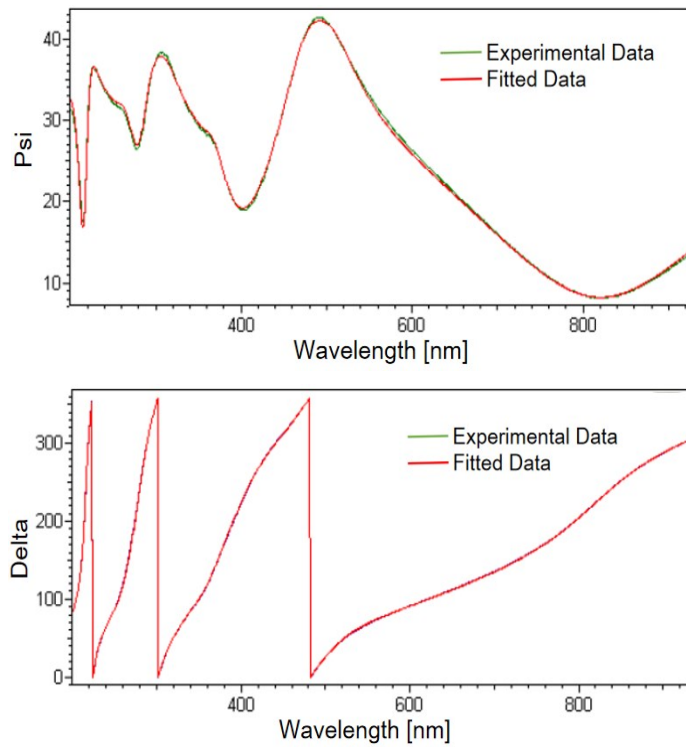

Figure S1. Experimental and fitted ellipsometry curves of the Cu film deposited on graphene in 6 nm Cu/Gr device.

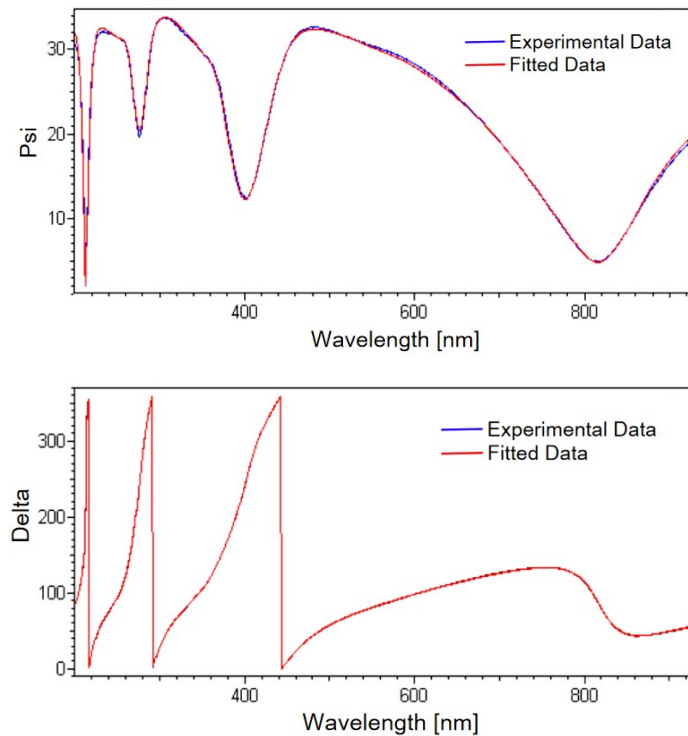

Figure S2. Experimental and fitted ellipsometry curves of the Cu film deposited on graphene in 8 nm Cu/Gr device.

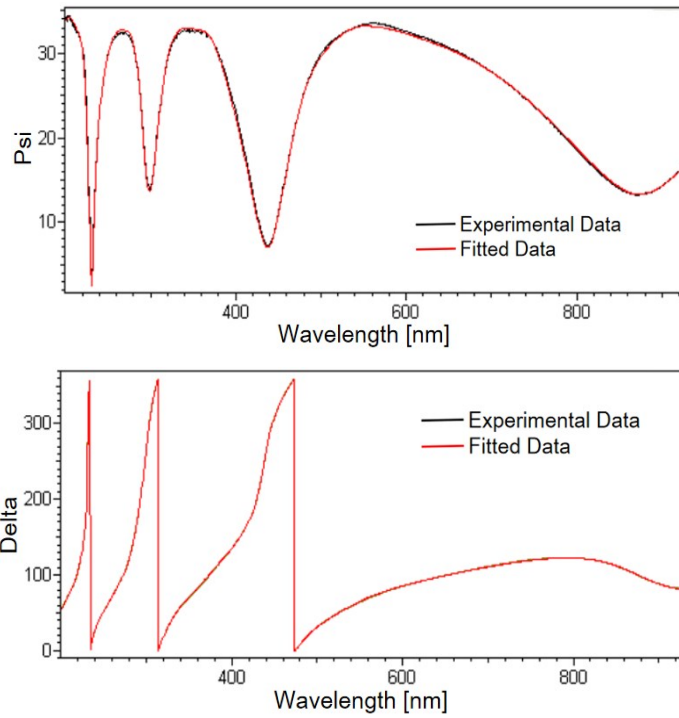

Figure S3. Experimental and fitted ellipsometry curves of the Cu film deposited on graphene in 10 nm Cu/Gr device.

Table S1. Fitted parameters derived from ellipsometry data in Fig. S1-S3.

| Device      | Thickness of Layers in Fitting [nm] |        |          |                  | Mean square error of fitting |
|-------------|-------------------------------------|--------|----------|------------------|------------------------------|
|             | Air Roughness of Copper oxide       | Copper | Graphene | SiO <sub>2</sub> |                              |
| 6 nm Cu/Gr  | 2.76                                | 5.29   | 0.34     | 319.47           | 0.708                        |
| 8 nm Cu/Gr  | 2.64                                | 7.45   | 0.34     | 312.05           | 0.801                        |
| 10 nm Cu/Gr | 2.86                                | 8.61   | 0.34     | 343.54           | 0.599                        |

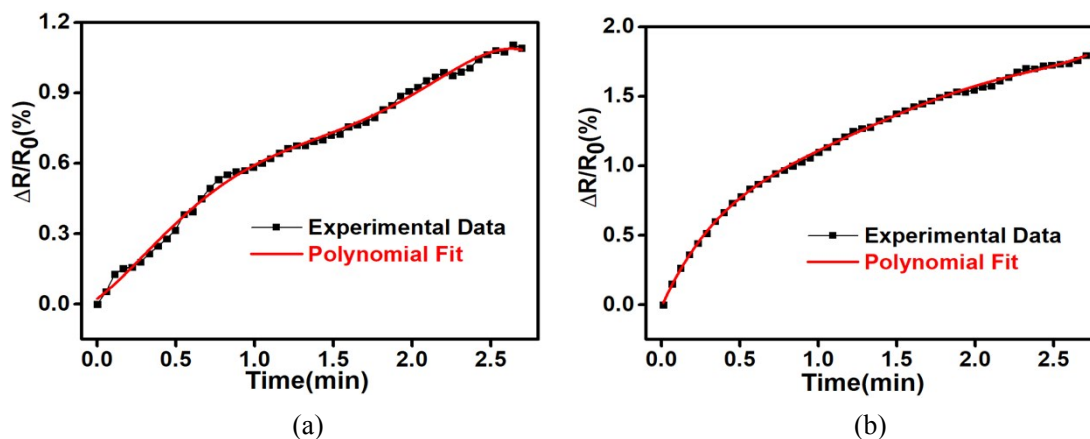

Figure S4. Polynomial fittings of  $\Delta R/R_0$  versus time plots at baseline for 8 nm Cu/Gr device exposed to (a)  $\text{NO}_2$ , and (b)  $\text{NH}_3$ , under UV light illumination.

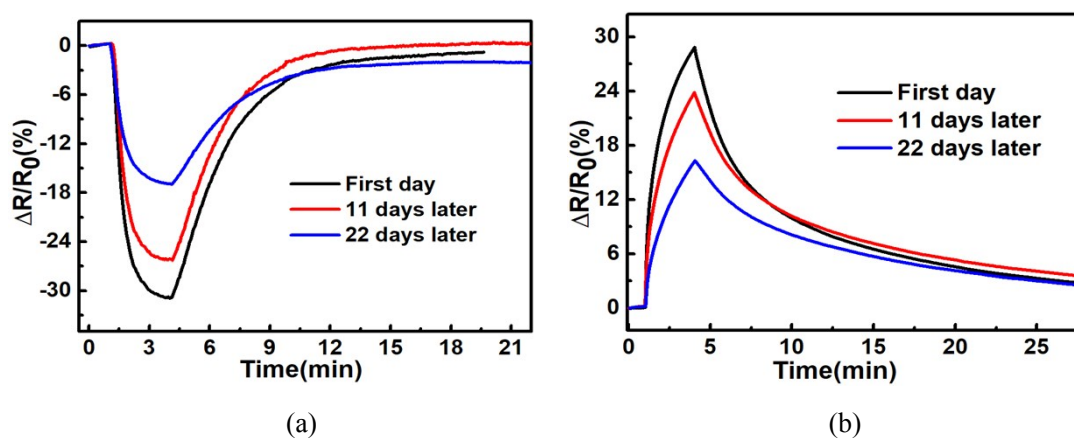

Figure S5. Stability behavior of 8 nm Cu/Gr device when exposed to (a) 5 ppm  $\text{NO}_2$ , and (b) 105 ppm  $\text{NH}_3$ , under UV light illumination.

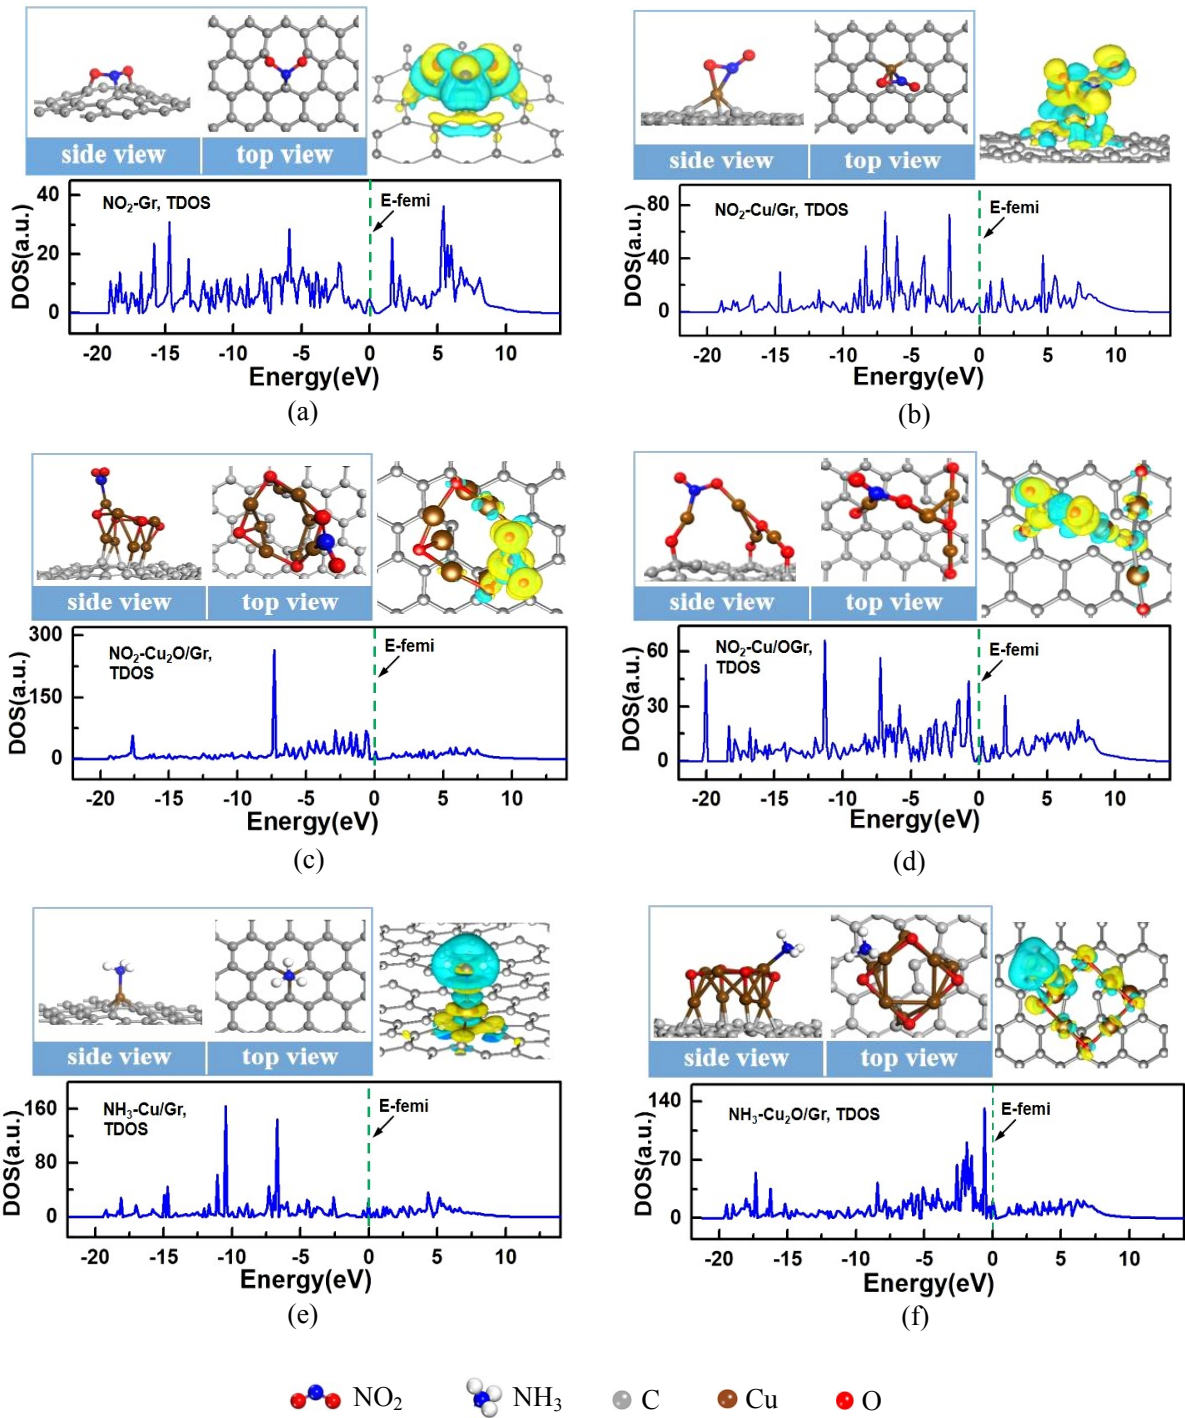

Figure S6. Optimized configurations including top view, side view, charge difference densities and TDOS for  $\text{NO}_2$  molecule adsorbed on surface of (a) defective graphene, (b) Cu/Gr, (c)  $\text{Cu}_2\text{O}$ /Gr, (d) CuO/Gr. Optimized configurations including top view, side view, charge difference densities and TDOS for  $\text{NH}_3$  molecule adsorbed on surface of (e) Cu/Gr, (f)  $\text{Cu}_2\text{O}$ /Gr.

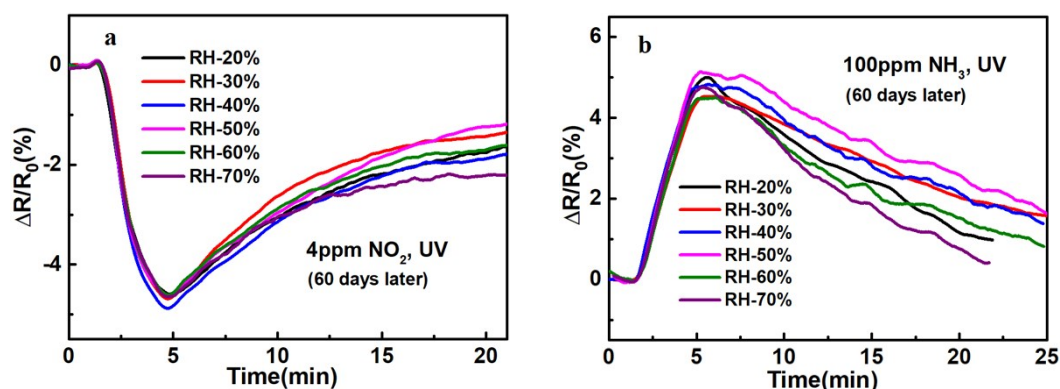

Figure S7. Response curves of 8 nm Cu/Gr device at RT exposed for 3 min to (a) 4 ppm NO<sub>2</sub>, and (b) 100 ppm NH<sub>3</sub> with various relative humidity (RH) within the range of 20-70% under UV light illumination.

Table S2. Comparison of sensing performances to NO<sub>2</sub> gas for 8 nm Cu/Gr device in this work with those graphene-based gas sensors reported in the literatures.

| Sensing materials                        | Concentration of NO <sub>2</sub> | Operating temperature | Response time | Response (ΔR/R <sub>0</sub> ) | Recovery time | References |
|------------------------------------------|----------------------------------|-----------------------|---------------|-------------------------------|---------------|------------|
| Al-decorated CVD graphene                | 1.2 ppm                          | 150 °C                | 3 min         | -3%                           | >20 min       | 1          |
| ZnO-decorated CVD graphene               | 10 ppm                           | 200 °C                | 13 min        | -30%                          | >80 min       | 2          |
| SnO <sub>2</sub> -decorated RGO          | 1000 ppm                         | RT                    | 4 min         | -22.87%                       | 1 min         | 3          |
| MoS <sub>2</sub> -RGO                    | 0.5 ppm                          | 200 °C                | 9 min         | -9.1%                         | 2 min         | 4          |
| 3D Graphene Hydrogel                     | 4 ppm                            | RT                    | 9 min         | -23.5%                        | 11 sec        | 5          |
| MoS <sub>2</sub> -RGO                    | 3 ppm                            | 160 °C                | 27 sec        | -18.6%                        | 20 sec        | 6          |
| SnO <sub>2</sub> nanofiber decorated RGO | 0.5 ppm                          | RT                    | 10 min        | +23%                          | 7.3 min       | 7          |
| rGO-Cu <sub>2</sub> O mesocrystal        | 2 ppm                            | RT                    | 15 min        | +67.8% (ΔI/I <sub>0</sub> )   | >25 min       | 8          |
| CuO/rGO nanohybrids                      | 1 ppm                            | RT                    | 1 min         | 14% (ΔI/I <sub>0</sub> )      | 0.57 min      | 9          |
| Cu-decorated CVD graphene                | 5 ppm                            | RT                    | 1.4 min       | -30.9%                        | 6.8 min       | This work  |

Table S3. Comparison of sensing performances to NH<sub>3</sub> gas for 8 nm Cu/Gr device in this work with those graphene-based gas sensors reported in the literatures.

| Sensing materials                                | Concentration of NH <sub>3</sub> | Operating temperature | Response time | Response ( $\Delta R/R_0$ ) | Recovery time | References |
|--------------------------------------------------|----------------------------------|-----------------------|---------------|-----------------------------|---------------|------------|
| Pt-decorated RGO                                 | 1000 ppm                         | RT                    | 2.7 min       | +10%                        | 4.8 min       | 10         |
| CVD graphene on aluminum oxide substrate         | 1300 ppm                         | RT                    | 2.6min        | +1.5%                       | 2.2 min       | 11         |
| Graphene-ssDNA                                   | 10 ppm                           | RT                    | 25 min        | +22%                        | Incomplete    | 12         |
| Ti-decorated CVD graphene                        | 400 ppm                          | RT                    | 2.5 min       | +17.9%                      | 3 min         | 13         |
| Graphene-porphyrin                               | 160 ppm                          | RT                    | 1 min         | -8.34%                      | Incomplete    | 14         |
| Graphene Platelets                               | 150 ppm                          | RT                    | 12 min        | +29%                        | >20 min       | 15         |
| CVD graphene                                     | 100 ppm                          | 300 °C                | 25 min        | +54%                        | 10 min        | 16         |
| Cu <sub>2</sub> O-functionalized-graphene-sheets | 25 ppm                           | RT                    | —             | +2%                         | —             | 17         |
| Cu <sub>2</sub> O nanorods modified RGO          | 100 ppm                          | RT                    | 0.47 min      | +70%                        | 3.43 min      | 18         |
| Cu-decorated CVD graphene                        | 105 ppm                          | RT                    | 2.3 min       | +29.1%                      | 22.4 min      | This work  |

## References

- 1 B. Cho, J. Yoon, M. G. Hahm, D.-H. Kim, A. R. Kim, Y. H. Kahng, S.-W. Park, Y.-J. Lee, S.-G. Park, J.-D.Kwon, C. S. Kim, M. Song, Y. Jeong, K.-S.k Nam and H. C. Ko, *J. Mater. Chem. C*, 2014, 2, 5280-5285.
- 2 H.F. Xie, K.K. Wang, Z.Q. Zhang, X.J. Zhao, F. Liu, H.C Mu, *RSC Adv.*, 2015, 5, 28030-28037.
- 3 D. Zhang, J. Liu, B. Xia, *J. Electron. Mater.*, 2016, 45, 4324-4330.
- 4 H.Long, A.Harley-Trochimczyk, T.Pham, Z.Tang, T.Shi, A.Zettl, C.Carraro, M. A.Worsley, R.Maboudian, *Adv. Func. Mater.*, 2016, 26, 5158-5165.
- 5 J. Wu, K. Tao, Y. Guo, Z. Li, X. Wang, Z. Luo, S. L.Feng, C. L. Du, D. Chen, J. M. Miao,

- L. K. Norford, *Adv. Sci.*, 2017, 4, No.1600319.
- 6 Z. Wang, T. Zhang, C. Zhao, T. Han, T. Fei, S. Liu, G. Lu, *Sens. Actuators B: Chem.*, 2018, 260, 508-518.
- 7 W.W. Lia, J.H. Guo, C. Li, W.Z. Qi, Y.L. Sun, J.L. Xu, M.X. Sun, H.W. Zhu, L. Xiang, D. Xie, T. L. Ren, *Sens. Actuators B: Chem.* 2019, 290, 443-452.
- 8 S. Deng, V. Tjoa, H. M. Fan, H. R. Tan, D. C. Sayle, M. Olivo, S. Mhaisalkar, J. Wei, C. H. Sow, *J. Am. Chem. Soc.*, 2012, 134, 4905-4917.
- 9 Z. J. Li, Y. Y. Liu, D. F. Guo, J. J. Guo, Y. L. Su, *Sens. Actuators B: Chem.*, 2018, 271, 306-310.
- 10 J. Wang, S. Rathi, B. Singh, I. Lee, S. Maeng, H. I. Joh and G. H. Kim, *Sens. Actuators B: Chem.*, 2015, 220, 755-761.
- 11 C. S. Yang, A. Mahmood, B. Kim, K. Shin, D. H. Jeon, J. K. Han, S. D. Bu, S. Park, W. J. Choi and B. Doudin, *2D Materials*, 2016, 3, 011007.
- 12 Y. Jung, H.G. Moon, C. Lim, K. Choi, H.S. Song, S. Bae, S.M. Kim, M. Seo, T. Lee, S. Lee, H.H. Park, S.C. Jun, C.Y. Kang, C. Kim, *Adv. Func. Mater.*, 2017, 27, No.1700068.
- 13 M. Zhao, L. Q. Yan, X. F. Zhang, L. H. Xu, Z. W. Song, P. P. Chen, F. L. Dong, W. G. Chu, *J. Mater. Chem. C*, 2017, 5, 1113-1120.
- 14 C. Mackin, V. Schroeder, A. Zurutuza, C. Su, J. Kong, T. M. Swager, Tomás Palacios, *ACS Appl. Mater. Interfaces*, 2018, 10, 16169-16176.
- 15 S. Nufer, M.J. Large, A.A. King, S.P. Ogilvie, A. Brunton, A.B. Dalton, *ACS Appl. Mater. Interfaces*, 2018, 10, 21740-21745.
- 16 H.Y. Wu, Q.F. Li, X.R. Bu, W.H. Liu, G.M. Cao, X. Li, X.L. Wang, *Sens. Actuators B: Chem.*, 2019, 282, 408-416.
- 17 L.S. Zhou, F.P. Shen, X.K. Tian, D.H. Wang, T. Zhang, W. Chen, *Nanoscale*, 2013, 5, 1564-1569.
- 18 H. Meng, W. Yang, K. Ding, L. Feng, Y. J. Guan, *J. Mater. Chem. A*, 2015, 3, 1174-1181.
